# Supplementary material
Source: HighWire-hosted journal article supplement (https://heartasia.bmj.com/content/11/1/e011139)
Supplement: inline-supplementary-material-1 [file inline-supplementary-material-1.docx]

Supplementary Data

| **Disease classification** | **ICD 10 code** |
| --- | --- |
| Acute Ischaemic Stroke | I63; I63.0; I63.1; I63.2; I63.3; I63.4; I63.5; I63.6; I63.8; I63.9 |
| Intracerebral Haemorrhage | I61; I61.0; I61.1; I61.2; I61.3; I61.4; I61.5; I61.6; I61.8; I61.9 |
| Stroke of undetermined pathology | I64 |
| Heart Failure | I25.5; I42.0; I42.9; I50; I50.0; I50.1; I50.9; I51.7 |
| Hypertension | I10; I11.0; I11.9; I12.0; I12.9; I15.1; I15.2; I15.8; I15.9; |
| Diabetes Mellitus | E10.9; E11.0; E11.2; E11.3; E11.4; E11.5; E11.6; E11.8; E11.9 |
| Dyslipidaemia | E75.6; E78.0; E78.1; E78.2; E78.3; E78.4; E78.5; E78.6; E78.8; E78.9 |
| Ischaemic Heart Disease | I20.0; I20.9; I25.0; I25.1; I25.2; I25.8; I25.9 |
| Valvular Disease | I06.2; I061; I060; I05.2; I05.9; I05.1; I05.0; I07.1; I08.0; I08.1; I08.3; I09.9; I35.1; I35.2; I35.0; I34.2; I34.0; I34.1 |
| Atrial Fibrillation | I48 |
| Other Arrhythmias | I49.0; I49.1; I49.3; I49.4; I49.5; I49.8; I49.9; R00; R00.0; R00.1; R00.2 |
| Peripheral Vascular Disease | I70.1; I70.2; I70.8; I70.9; I71.0; I71.2; I71.4; I71.9; I72.9; I73.9; I74.2; I74.3; I74.9; I77.1; I77.6 |
| Cancers | C11.9; C18.9; C20; C22.0; C22.1; C34.9; C50.9; C53.9; C61; C67.9; C73; C77.9; C78.2; C79.3; C79.5; C79.8 |
| Chronic Obstructive Pulmonary Disease | J42; J43.9; J44; J44.0 |
| Chronic Kidney Disease | N18; N18.0; N18.1; N18.2; N18.3; N18.4; N18.5; N18.9; N19; Z99.2 |
| Liver Disease | K70.1; K70.3; K71.2; K71.6; K72.0; K72.9; K74.6; K75.0; K75.8; K75.9; K76.0; K76.9; R18 |
| Anaemia | D50.0; D50.8; D50.9; D52.9; D53.1; D53.9; D61.9; D62; D63; D63.0; D63.1; D63.8; D64.8; D64.9 |
| Alcohol-related disorders | F10.0; F10.1; F10.2; F10.20 |
| Neurodegenerative disorders | F03; F03.0; G31.0; G31.1; G31.9 |
| Fever | R50.8; R50.9 |
| Hyperglycaemia | R73.0; R73.9 |
| Hypoglycaemia | E16.1; E16.2 |
| Respiratory Failure | J96; J96.0; J96.1; J96.9 |
| Pneumonia | J13; J14; J15; J15.0; J15.1; J15.2; J15.4; J15.5; J15.6; J15.8; J15.9; J18; J18.0; J18.1; J18.2; J18.8; J18.9; J22 |
| Sepsis | A02.1; A40.1; A40.8; A40.9; A41; A41.0; A41.1; A41.2; A41.5; A41.8; A41.9; B37.7; E02; R65.2 |
| Shock | R57; R57.0; R57.1; R57.8; R57.9 |
| Myocardial Infarction | I21; I21.0I21.4; I21.1; I21.2; I21.3; I22.9; I24.9 |
| Acute Kidney Injury | N10; N17; N17.0; N17.8; N17.9 |
| Coma | E15; R40.2 |
| Pulmonary Oedema | J81 |
|  | |
| **Procedure** | **ICD 9 code** |
| Mechanical Ventilation | 9390; 9670; 9671; 9672 |
| Tracheostomy | 311; 3129 |
| Gastrostomy | 4311 |
| Thrombolysis | 9910 |
| Echocardiography | 8872 |

**Supplementary Table 1**. International Classification of Disease codes utilised in extracting the data regarding the listed co-morbidities, complications and procedures from the insurance database.

|  | Death in hospital | |
| --- | --- | --- |
|  | OR [99%CI] | *P* value |
| All strokes | **1.86 [1.78-1.93]** | **< 0.001** |
| Acute Ischemic Stroke | **2.46 [2.34-2.58]** | **< 0.001** |
| Intracerebral Haemorrhage | **1.47 [1.35-1.60]** | **< 0.001** |
| Stroke of undetermined pathology | **1.92 [1.62-2.28]** | **< 0.001** |

**Supplementary Table 2**. Influence of pre-existing Heart Failure on stroke mortality in hospital (results of multivariable logistic regression with no HF as reference category; adjustments restricted to age, sex, co-morbid cardiovascular disease (hypertension, diabetes mellitus, dyslipidaemia, ischaemic heart disease, valvular disease, atrial fibrillation, other arrhythmias and peripheral vascular disease) and cancers. Results in **bold** are statistically significant (*P* < 0.01).

|  | Acute Ischaemic Stroke | Intracerebral Haemorrhage | Stroke of undetermined pathology |
| --- | --- | --- | --- |
| Age |  |  |  |
| Sex | * |  | * |
| Heart Failure |  | ** |  |
| Hypertension | * |  | * |
| Diabetes Mellitus | * | * | * |
| Dyslipidaemia |  |  |  |
| Ischaemic Heart Disease |  |  | * |
| Valvular disease |  |  |  |
| Atrial Fibrillation |  |  |  |
| Arrhythmias |  | * | * |
| Peripheral Vascular Disease |  |  |  |
| Cancers |  |  |  |
| Chronic Obstructive Pulmonary Disease |  |  |  |
| Chronic Kidney Disease |  |  |  |
| Liver Disease |  |  |  |
| Anaemia |  |  |  |
| Alcohol-related disorders | * | * | * |
| Neurodegenerative disorders |  | * |  |
| Fever |  | * |  |
| Hyperglycaemia | * |  |  |
| Hypoglycaemia |  | * |  |

**Supplementary Table 3.** Co-variates included in the multivariable models with the outcome of long-term mortality.*Variable was found to be non-concordant with the proportional hazards assumption and was modelled as a non-constant function of time using the Weibull distribution. ** Variable was found to be non-concordant with the proportional hazards assumption and was modelled as a non-constant function of time using restricted cubic splines with 5 degrees of freedom.

|  | HF (10 year - Survival [99%CI]) | No HF (10 year -Survival [99%CI]) |
| --- | --- | --- |
| Ischaemic | 17.92% [17.24% - 18.63%] | 37.28% [36.93% - 37.65%] |
| Haemorrhagic | 18.87% [16.63% - 21.41%] | 38.6% [38.07% - 39.08%] |
| Undetermined | 15.72% [14.30% - 17.27%] | 34.78% [34.15% - 35.42%] |

**Supplementary Table 4**. Predicted values of the survival functions (presented as point estimates and 99% confidence interval values) for stroke type calculated for patients with and without co-morbid HF.

|  | AIS | ICH |
| --- | --- | --- |
| **Transition** | HR[99% CI] | HR[99% CI] |
| Baseline – Recurrent stroke | * | * |
| Baseline – death | 1.69[1.64-1.74] | * |
| Recurrent stroke – death | 1.45[1.34-1.57] | 1.28[0.99-1.66] |

*Hazard Ratio modelled as a function of time due to non-concordance with the proportional hazard assumption. Graph of the function illustrated in Figure 6

**Supplementary Table 5**. Hazard Ratios of each transition, calculated for patients with HF (with no HF as reference).


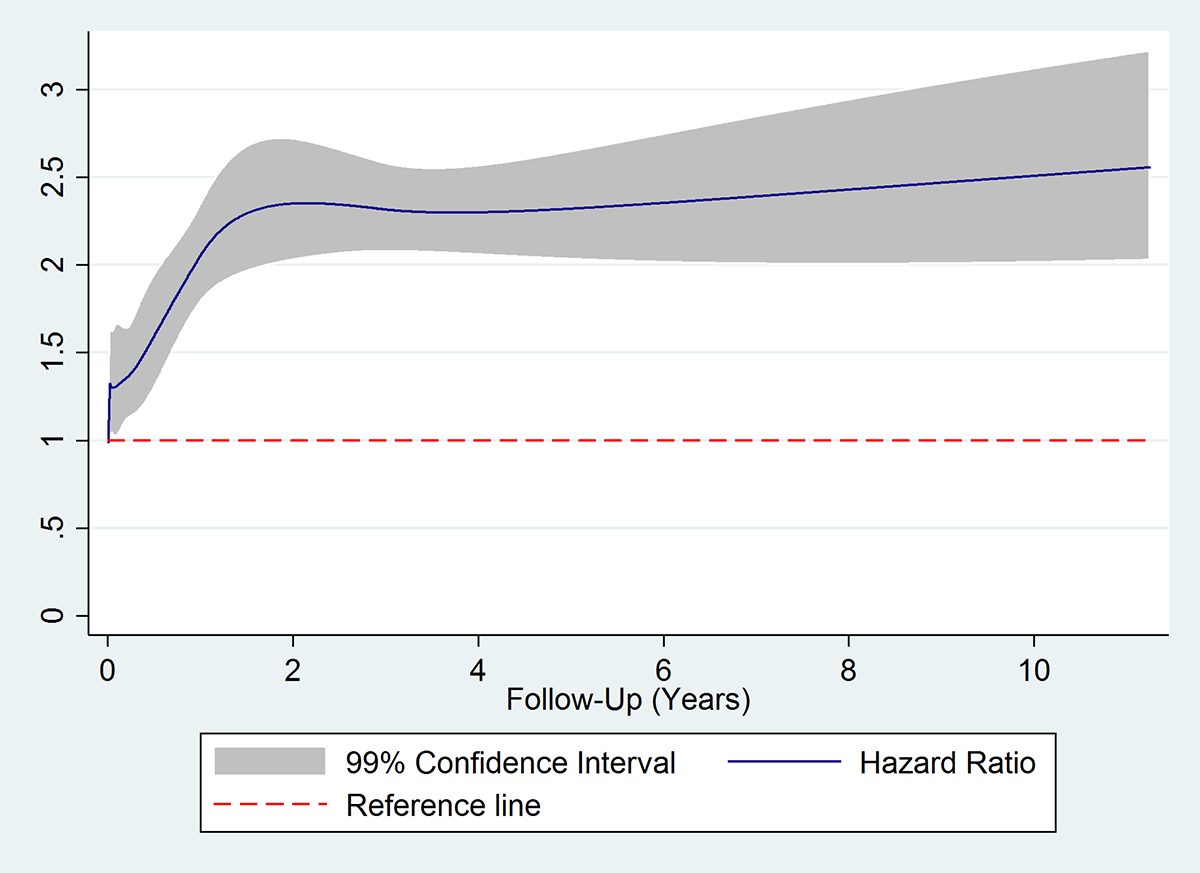


**Supplementary Figure 1**. The hazard ratio (HR) calculated for patients with intracerebral haemorrhage and co-morbid heart failure (with no heart failure as the reference category). The solid line represents the point estimate, whilst the shaded area is bound by the extreme values of the 99% confidence interval

| 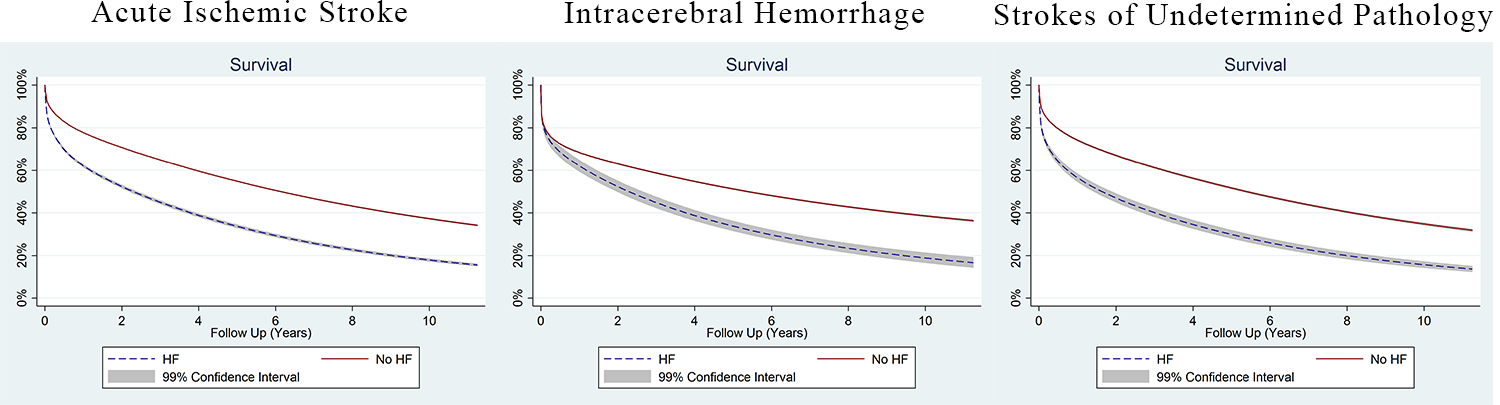 |
| --- |
|  |

**Supplementary Figure 2**. Predicted survival probability stratified by HF status. Separate calculations were performed for each stroke type. The solid line represents the point estimates in patients without co-morbid heart failure, whilst the dashed line represents the point estimates in patients with co-morbid heart failure. The shaded areas are bound by the extreme values of the 99% confidence interval for each respective point estimate

**Supplementary Figure 3**. Flowchart of first-ever stroke patients admitted with Acute Ischemic Stroke (AIS) and Intracranial Haemorrhage (ICH) respectively.


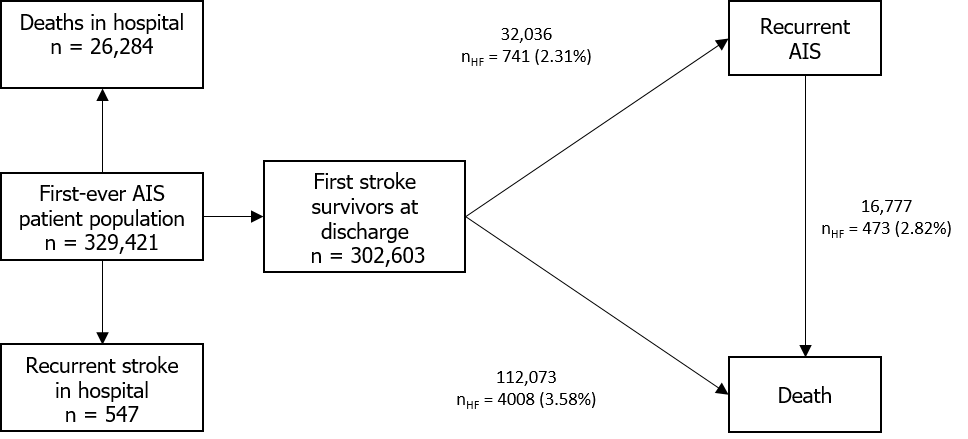

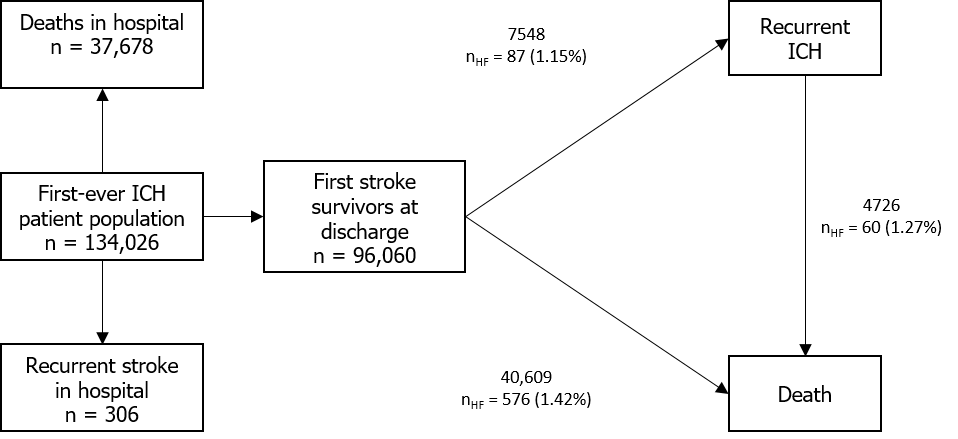


|  |  |
| --- | --- |
|  |  |
|  |  |


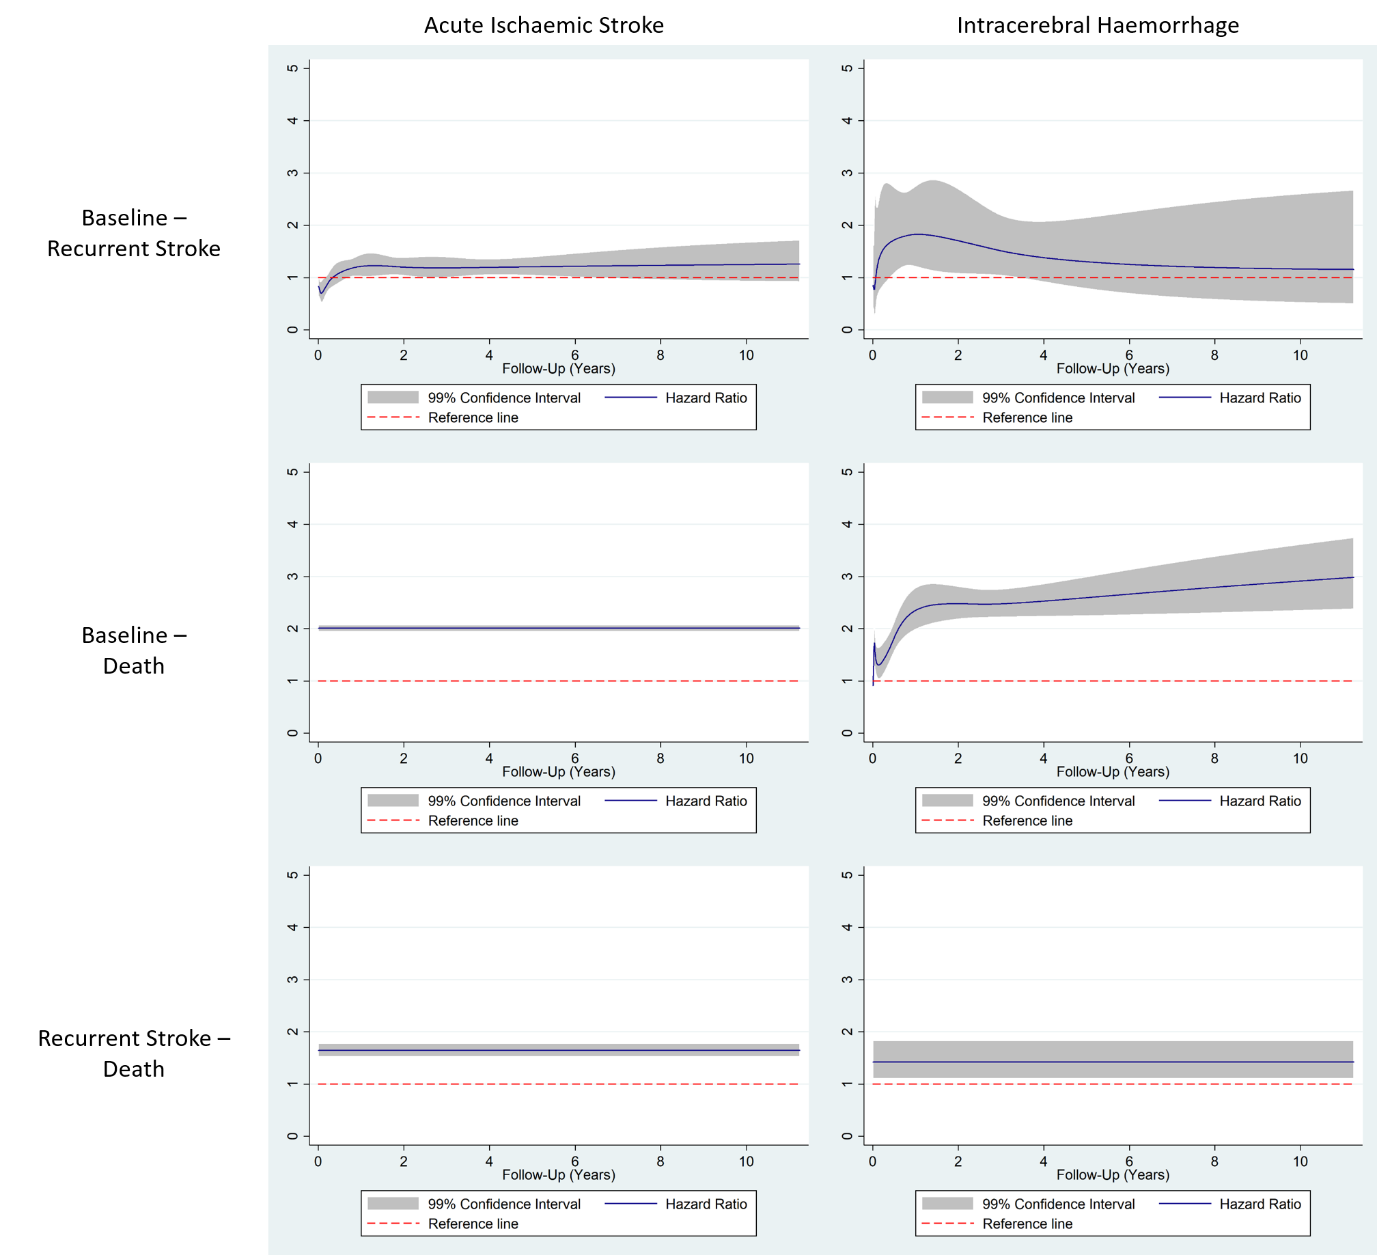
**Supplementary Figure 4**. Results of the sensitivity multi-state analysis adjusting only for age, sex, co-morbid cardiovascular disease (hypertension, diabetes mellitus, dyslipidaemia, ischaemic heart disease, valvular disease, atrial fibrillation, other arrhythmias and peripheral vascular disease) and cancers. Hazard Ratio (HR) functions were plotted against the post-discharge follow-up time. The solid line represents the point estimate, whilst the shaded area is bound by the limits of the 99% confidence interval. The dashed line represents the reference line (HR = 1).
